# Supplementary material for: The topology, structure and PE interaction of LITAF underpin a Charcot-Marie-Tooth disease type 1C
Source: PubMed Central journal article supplement (PMC5142333; doi:10.1186/s12915-016-0332-8), 2016-12-07
Supplement: 12915_2016_332_MOESM1_ESM.pdf [file 12915_2016_332_MOESM1_ESM.pdf]

Figure S1

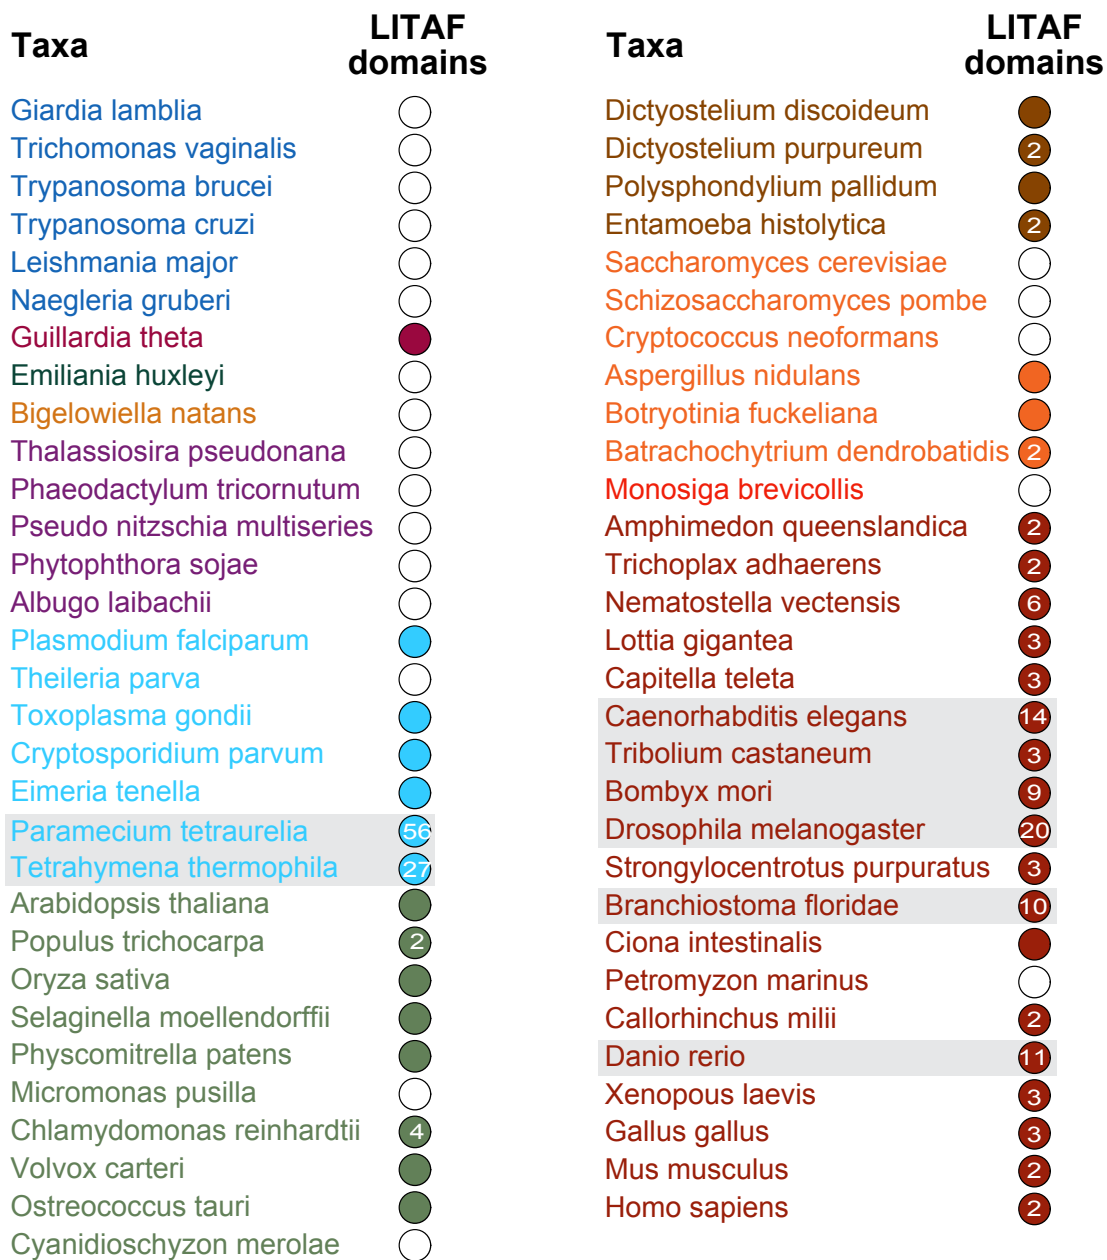

Excavata Cryptophyta Haptophyta Rhizaria Stramenopila Alveolata  
 Archaeplastida Amoebozoa Fungi Holozoa Metazoa
