# Supplementary material for: The topology, structure and PE interaction of LITAF underpin a Charcot-Marie-Tooth disease type 1C
Source: PubMed Central journal article supplement (PMC5142333; doi:10.1186/s12915-016-0332-8), 2016-12-07

**Figure S4**

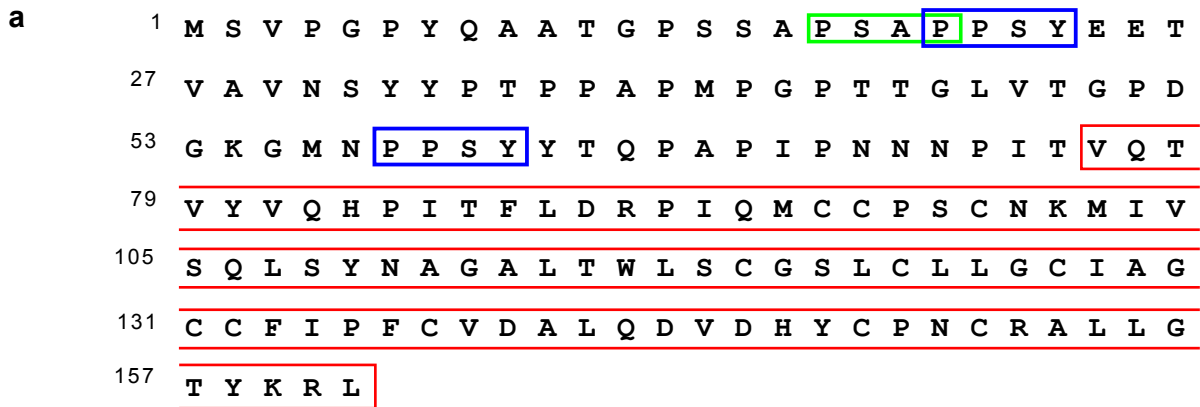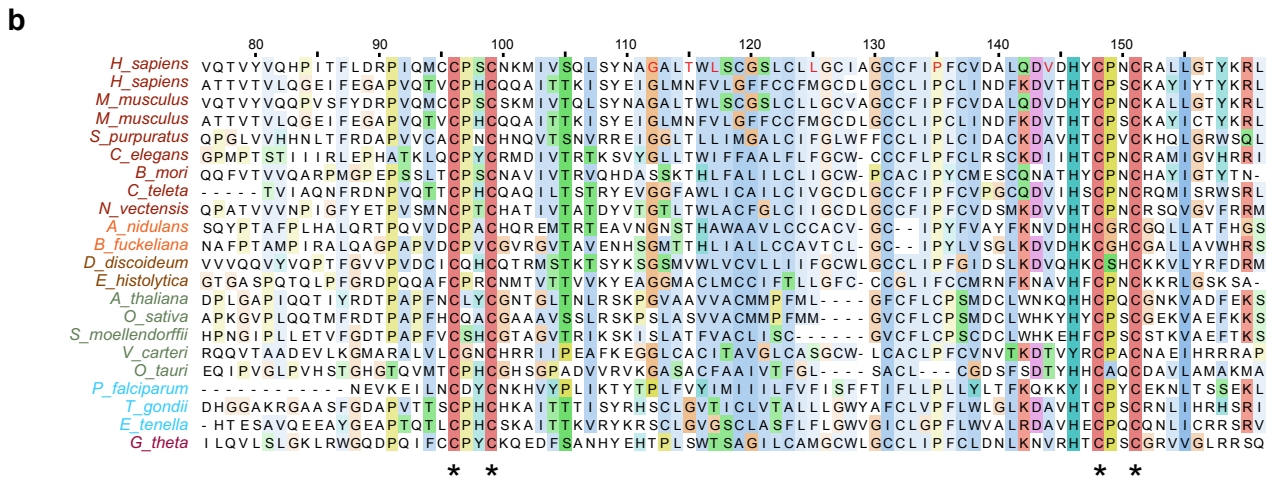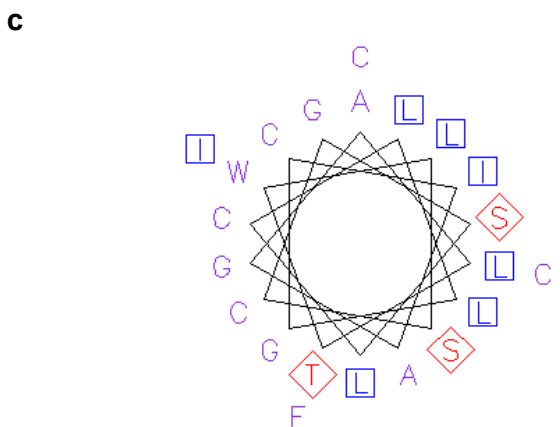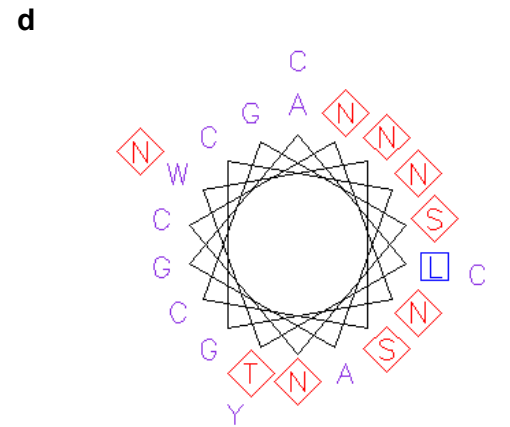

Supplement: 12915_2016_332_MOESM4_ESM.pdf [file 12915_2016_332_MOESM4_ESM.pdf]
